# Supplementary material
Source: ML conference proceedings conference paper supplement (https://openreview.net/forum?id=HuC8dszO8r)
Supplement: supplementary_material [file attachment]

## Sheet: Tabelle1
timestamp	goal	start_with	load_replay	algorithm	pretrained on	trained on
1715087568	0.9	0	0	TQC	0	optics lab
1714326368	0.89	1714286125_64000	0	TQC	lower power	optics lab
1714485701	0.89	1714246042_63000	1	TQC	lower power	optics lab
1714286125	0.875	1714153135_38000	0	TQC	lower power	optics lab
1714246042	0.875	1714153135_38000	1	TQC	lower power	optics lab
1714729306	0.85	0	0	TQC	0	optics lab
1714585324	0.85	0	0	SAC	0	optics lab
1714656374	0.85	0	0	SAC	0	optics lab
1714153135	0.85	0	0	TQC	0	optics lab
1714375298	0.9	1714326368_98000	0	TQC	lower power	optics lab
1715453496	0.9	1714485701_98000	1	TQC	lower power	optics lab
1714976689	0.88	0	0	TQC	0	optics lab
1714915417	0.87	0	0	TQC	0	optics lab
1714802328	0.86	0	0	TQC	0	optics lab
1715850724	0.9	1715764610_500000	0	TQC	virtual testbed	optics lab
1715764610	0.9	0	0	TQC	0	virtual testbed
1722503801	0.9	1722497869_500000	0	TQC	virtual testbed with noise	optics lab
1722497869	0.9	0	0	TQC		virtual testbed with noise
