# Supplementary material
Source: ML conference proceedings conference paper supplement (https://openreview.net/forum?id=HuC8dszO8r)

**(a)**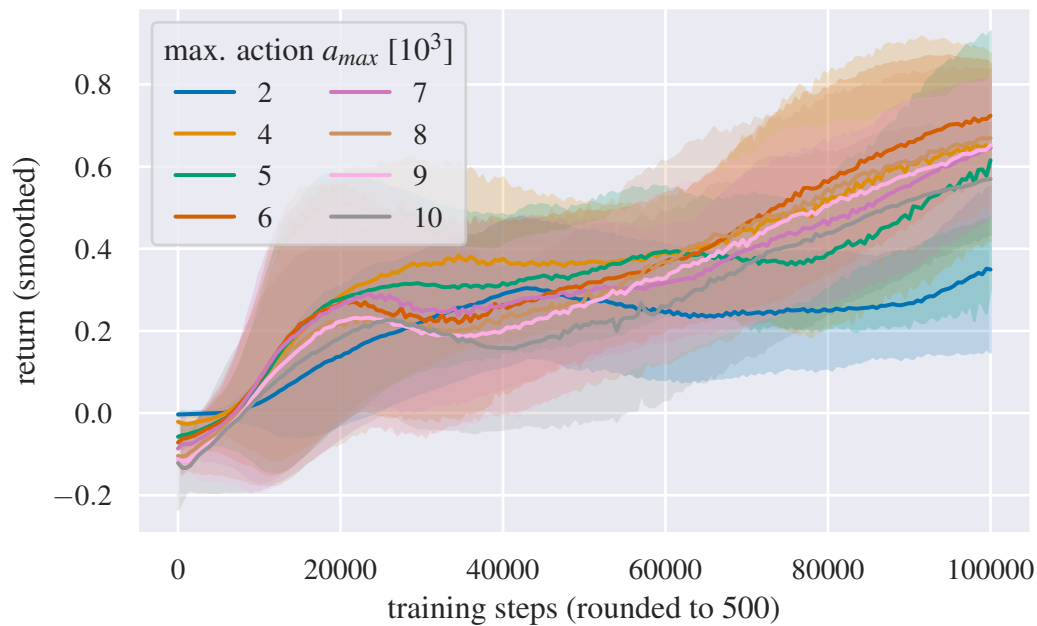**(b)**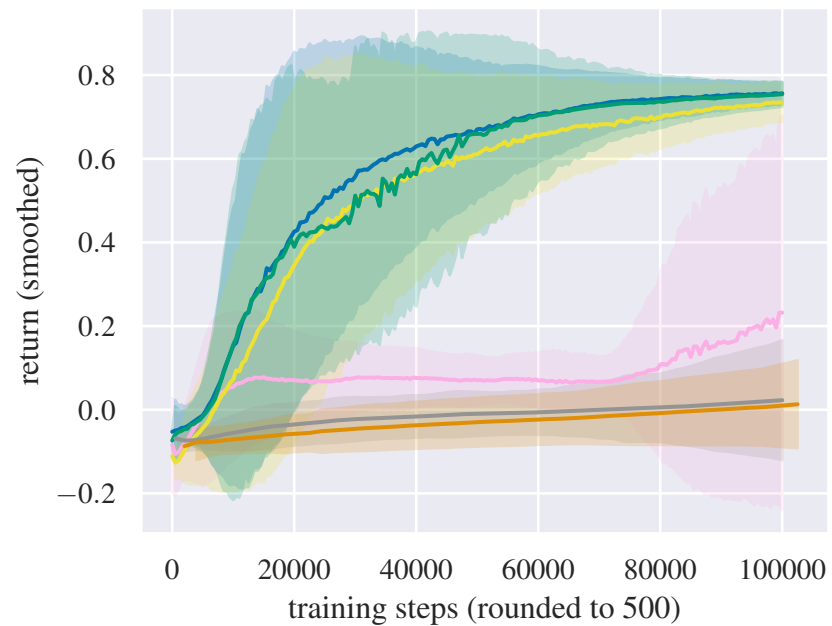**(c)**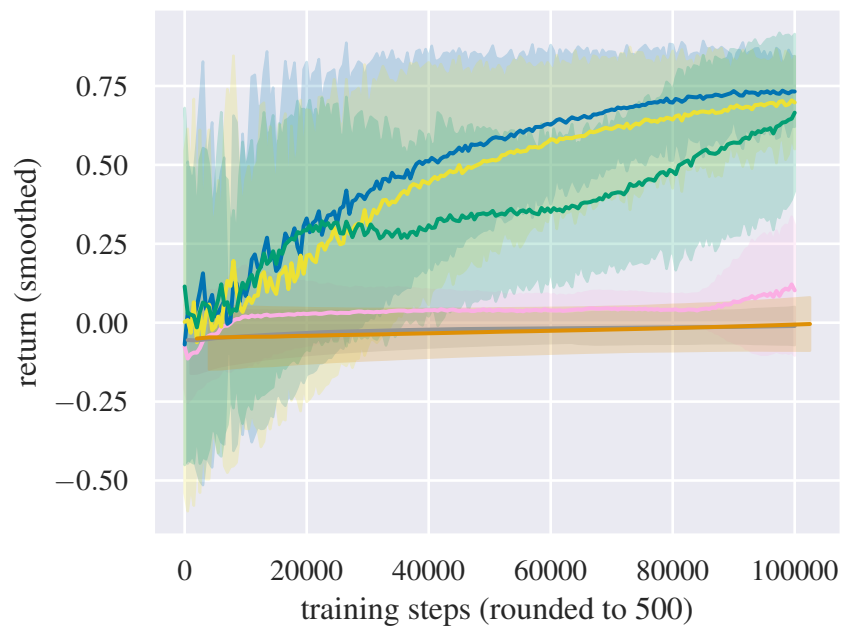**(d)**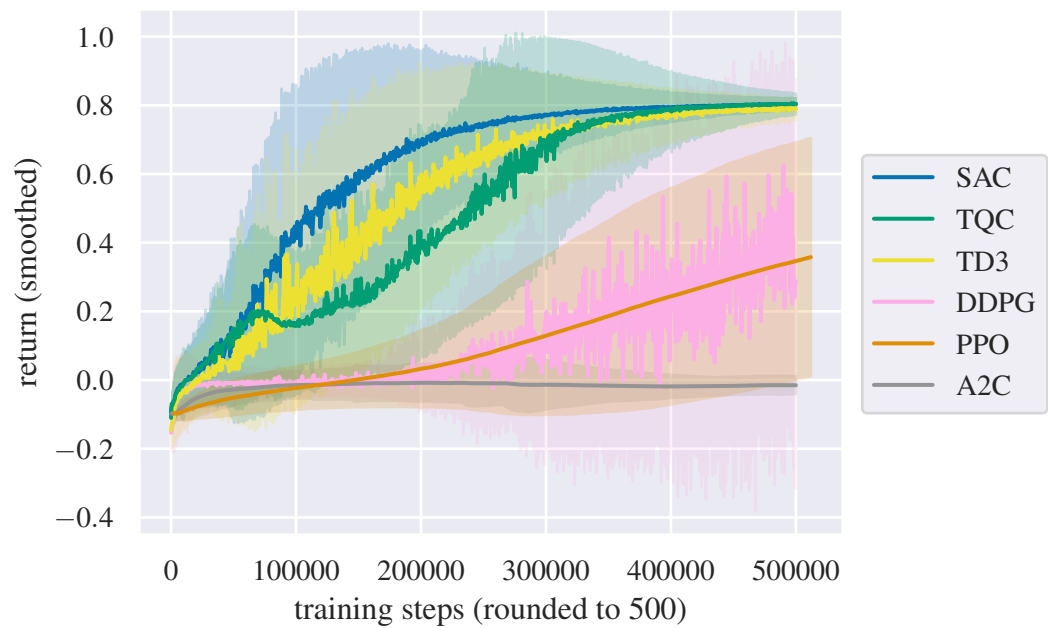

Supplement: supplementary_material [file attachment]

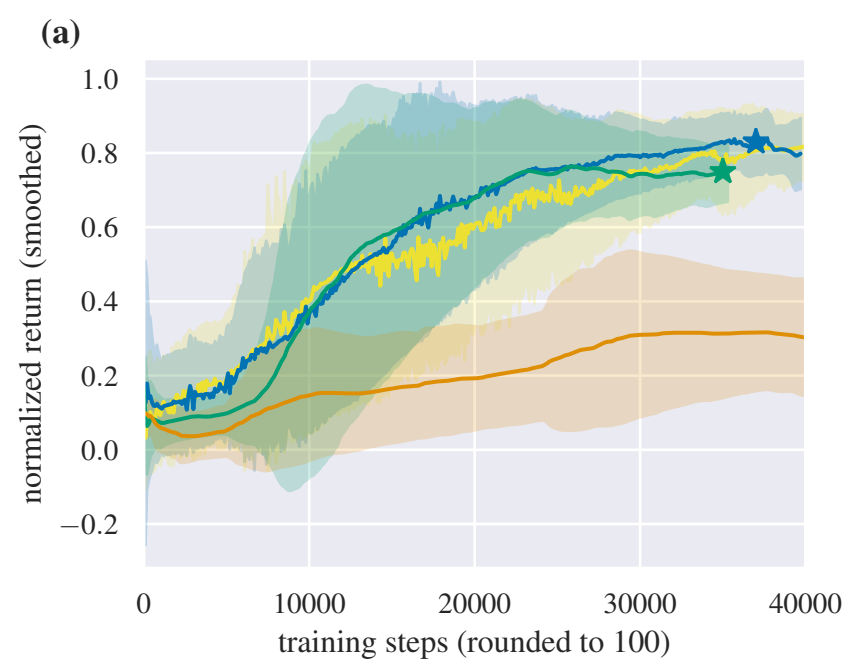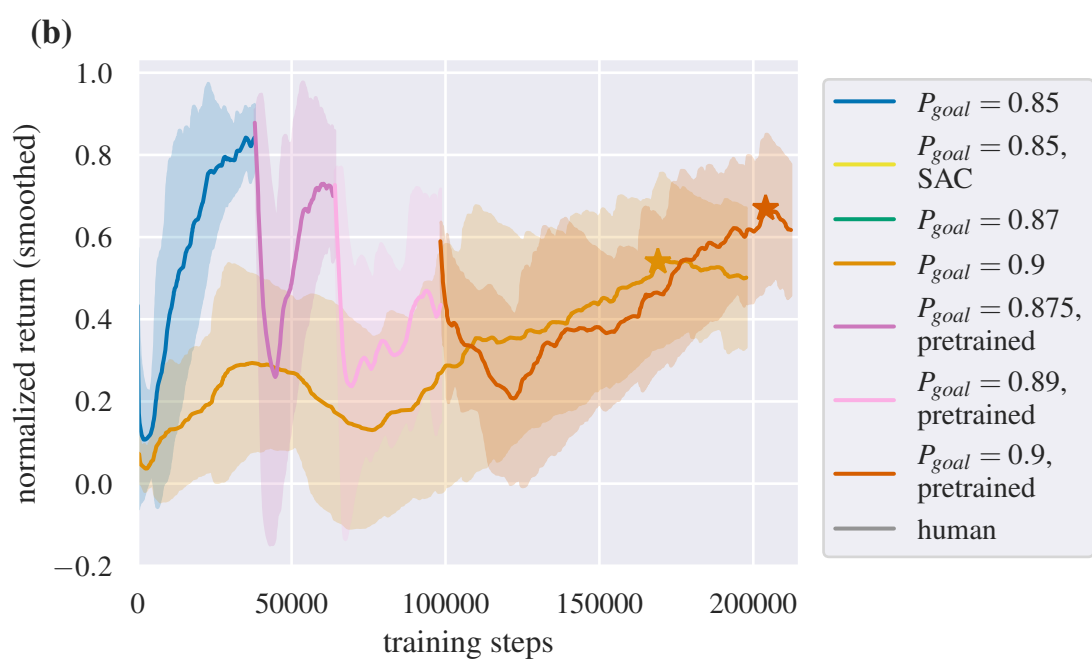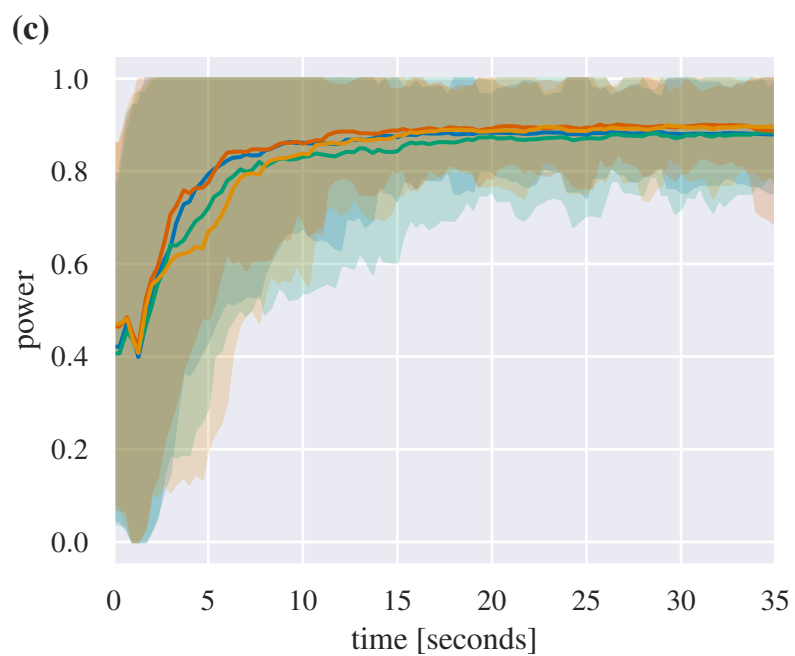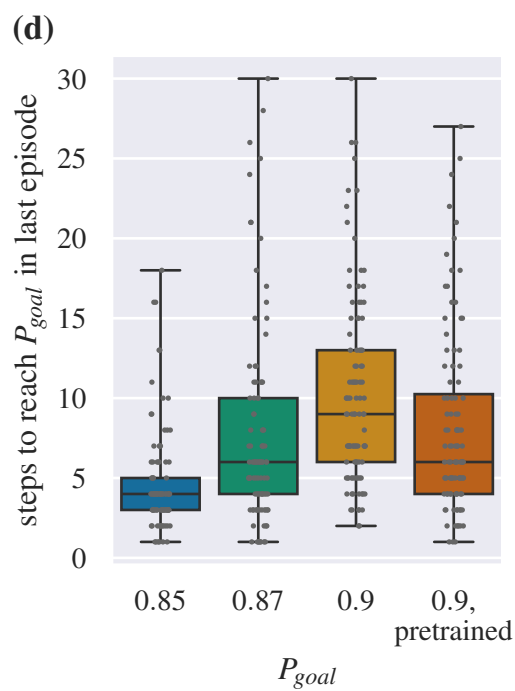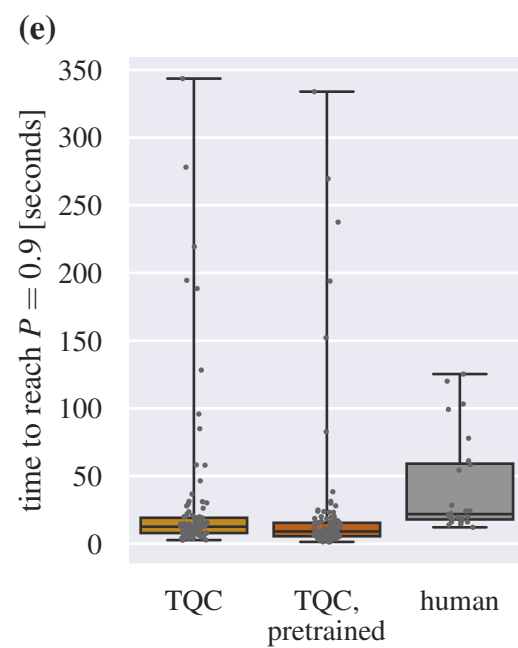

Supplement: supplementary_material [file attachment]
